# Supplementary material
Source: Springer Nature journal article supplement (https://www.springermedizin.de/resource/supplementary/12889_2011_3975_MOESM7_ESM.PDF/9490832)
Supplement: MOESM7 [file 9490832]

**ADDITIONAL FILE 7 Absolute change in cardiovascular risk factors in men aged  $\geq 55$  years, by deprivation quintiles (1/2)**

|                                           |                         | <b>England</b>                | <b>Q1<br/>Most affluent</b> | <b>Q2</b>              | <b>Q3</b>              | <b>Q4</b>              | <b>Q5<br/>Most deprived</b> |
|-------------------------------------------|-------------------------|-------------------------------|-----------------------------|------------------------|------------------------|------------------------|-----------------------------|
| <b>Cigarette Smoking (%)</b>              | 1994                    | <b>19.9</b> (18.3 to 21.6)    | 12.1 (9.3 to 14.9)          | 15.5 (12.3 to 18.6)    | 18.8 (15.3 to 22.3)    | 22.1 (18.2 to 26.1)    | 33.4 (28.7 to 38.0)         |
|                                           | 2008                    | <b>15.0</b> (13.5 to 16.4)    | 6.5 (4.6 to 8.4)            | 11.1 (8.4 to 13.7)     | 11.4 (8.5 to 14.3)     | 19.8 (15.9 to 23.7)    | 27.5 (23.3 to 31.7)         |
|                                           | <i>Change from 1994</i> | <b>-4.9</b> (-7.1 to -2.7)    | -5.6 (-9.0 to -2.2)         | -4.4 (-8.5 to -0.3)    | -7.4 (-12.0 to -2.9)   | -2.3 (-7.9 to 3.2)     | -5.8 (-12.1 to 0.4)         |
|                                           | <i>P-value</i>          | <b>(&lt;0.000)</b>            | (0.001)                     | (0.034)                | (0.001)                | (0.411)                | (0.067)                     |
| <b>BMI (kg/m<sup>2</sup>)</b>             | 1994                    | <b>26.9</b> (26.8 to 27.1)    | 26.8 (26.4 to 27.2)         | 26.9 (26.5 to 27.2)    | 26.9 (26.6 to 27.2)    | 27.2 (26.8 to 27.6)    | 26.9 (26.5 to 27.3)         |
|                                           | 2008                    | <b>28.4</b> (28.2 to 28.6)    | 28.1 (27.7 to 28.4)         | 28.7 (28.3 to 29.1)    | 28.5 (28.1 to 28.9)    | 28.3 (27.8 to 28.8)    | 28.4 (27.9 to 29.0)         |
|                                           | <i>Change from 1994</i> | <b>1.5</b> (1.2 to 1.7)       | 1.3 (0.8 to 1.8)            | 1.9 (1.3 to 2.4)       | 1.6 (1.1 to 2.1)       | 1.1 (0.4 to 1.7)       | 1.5 (0.8 to 2.2)            |
|                                           | <i>P-value</i>          | <b>(&lt;0.000)</b>            | (<0.000)                    | (<0.000)               | (<0.000)               | (0.001)                | (<0.000)                    |
| <b>Obesity (%)</b>                        | 1994                    | <b>17.3</b> (15.7 to 18.8)    | 15.4 (11.8 to 18.9)         | 15.6 (12.2 to 19.0)    | 16.7 (13.3 to 20.0)    | 19.8 (15.9 to 23.7)    | 19.5 (15.4 to 23.6)         |
|                                           | 2008                    | <b>31.8</b> (29.8 to 33.8)    | 27.5 (23.8 to 31.1)         | 32.9 (28.6 to 37.1)    | 32.5 (28.3 to 36.7)    | 32.2 (27.2 to 37.1)    | 34.4 (29.0 to 39.8)         |
|                                           | <i>Change from 1994</i> | <b>14.5</b> (12.0 to 17.0)    | 12.1 (7.0 to 17.2)          | 17.3 (11.9 to 22.7)    | 15.9 (10.5 to 21.2)    | 12.4 (6.1 to 18.6)     | 14.9 (8.1 to 21.7)          |
|                                           | <i>P-value</i>          | <b>(&lt;0.000)</b>            | (<0.000)                    | (<0.000)               | (<0.000)               | (<0.000)               | (<0.000)                    |
| <b>Diabetes (%)</b>                       | 1994                    | <b>6.4</b> (5.4 to 7.4)       | 7.0 (5.0 to 9.1)            | 4.5 (2.6 to 6.3)       | 5.4 (3.4 to 7.3)       | 7.6 (5.1 to 10.1)      | 8.0 (5.2 to 10.8)           |
|                                           | 2006                    | <b>12.0</b> (10.3 to 13.6)    | 10.2 (7.1 to 13.2)          | 10.6 (7.3 to 13.8)     | 10.9 (8.1 to 13.7)     | 11.3 (7.5 to 15.2)     | 17.4 (12.4 to 22.4)         |
|                                           | <i>Change from 1994</i> | <b>5.5</b> (3.6 to 7.4)       | 3.1 (-0.6 to 6.8)           | 6.1 (2.4 to 9.8)       | 5.6 (2.1 to 9.0)       | 3.7 (-0.8 to 8.3)      | 9.4 (3.7 to 15.1)           |
|                                           | <i>P-value</i>          | <b>(&lt;0.000)</b>            | (0.100)                     | (0.001)                | (0.002)                | (0.110)                | (0.001)                     |
| <b>High physical activity (%)</b>         | 1998                    | <b>13.7</b> (12.3 to 15.2)    | 15.3 (12.0 to 18.6)         | 15.7 (12.3 to 19.0)    | 13.1 (9.8 to 16.3)     | 14.3 (11.2 to 17.4)    | 9.8 (6.9 to 12.8)           |
|                                           | 2008                    | <b>17.9</b> (16.4 to 19.5)    | 21.0 (17.9 to 24.1)         | 20.7 (16.9 to 24.6)    | 19.1 (15.9 to 22.4)    | 16.2 (12.3 to 20.1)    | 12.1 (9.0 to 15.3)          |
|                                           | <i>Change from 1998</i> | <b>4.2</b> (2.1 to 6.3)       | 5.7 (1.2 to 10.2)           | 5.1 (0.0 to 10.2)      | 6.0 (1.5 to 10.6)      | 1.9 (-3.1 to 6.9)      | 2.3 (-2.0 to 6.6)           |
|                                           | <i>P-value</i>          | <b>(&lt;0.000)</b>            | (0.013)                     | (0.052)                | (0.010)                | (0.454)                | (0.298)                     |
| <b>SBP (mmHg)</b>                         | 1994                    | <b>143.1</b> (142.2 to 143.9) | 143.0 (141.2 to 144.8)      | 142.2 (140.5 to 143.9) | 142.5 (140.7 to 144.2) | 143.0 (141.1 to 144.9) | 145.1 (143.1 to 147.2)      |
|                                           | 2008                    | <b>135.5</b> (134.7 to 136.4) | 135.1 (133.5 to 136.6)      | 135.5 (133.7 to 137.3) | 135.3 (133.5 to 137.2) | 135.9 (133.8 to 138.0) | 136.1 (133.8 to 138.4)      |
|                                           | <i>Change from 1994</i> | <b>-7.5</b> (-8.7 to -6.3)    | -7.9 (-10.3 to -5.5)        | -6.7 (-9.2 to -4.3)    | -7.1 (-9.7 to -4.6)    | -7.1 (-10.0 to -4.3)   | -9.0 (-12.1 to -5.9)        |
|                                           | <i>P-value</i>          | <b>(&lt;0.000)</b>            | (<0.000)                    | (<0.000)               | (<0.000)               | (<0.000)               | (<0.000)                    |
| <b>SBP <math>\geq 140</math> mmHg (%)</b> | 1994                    | <b>51.8</b> (49.4 to 54.1)    | 52.9 (48.2 to 57.6)         | 48.9 (44.1 to 53.7)    | 48.6 (43.6 to 53.6)    | 53.4 (48.0 to 58.7)    | 56.2 (50.9 to 61.6)         |
|                                           | 2008                    | <b>37.4</b> (35.1 to 39.7)    | 37.0 (32.4 to 41.5)         | 39.5 (34.5 to 44.5)    | 35.4 (30.5 to 40.4)    | 37.0 (31.3 to 42.7)    | 38.1 (31.9 to 44.4)         |
|                                           | <i>Change from 1994</i> | <b>-14.4</b> (-17.7 to -11.1) | -15.9 (-22.5 to -9.4)       | -9.4 (-16.3 to -2.4)   | -13.1 (-20.2 to -6.1)  | -16.4 (-24.2 to -8.5)  | -18.1 (-26.4 to -9.8)       |
|                                           | <i>P-value</i>          | <b>(&lt;0.000)</b>            | (<0.000)                    | (0.008)                | (<0.000)               | (<0.000)               | (<0.000)                    |

**ADDITIONAL FILE 7 Absolute change in cardiovascular risk factors in men aged ≥ 55 years, by deprivation quintiles (2/2)**

|                                                                   |                         | <b>England</b>                | <b>Q1<br/>Most affluent</b> | <b>Q2</b>              | <b>Q3</b>              | <b>Q4</b>              | <b>Q5<br/>Most deprived</b> |
|-------------------------------------------------------------------|-------------------------|-------------------------------|-----------------------------|------------------------|------------------------|------------------------|-----------------------------|
| <b>Total cholesterol (mmol/l)</b>                                 | 1994                    | <b>6.2</b> (6.1 to 6.2)       | 6.3 (6.2 to 6.4)            | 6.1 (6.0 to 6.2)       | 6.1 (6.0 to 6.2)       | 6.1 (6.0 to 6.3)       | 6.2 (6.1 to 6.3)            |
|                                                                   | 2008                    | <b>5.3</b> (5.2 to 5.3)       | 5.4 (5.3 to 5.5)            | 5.3 (5.1 to 5.4)       | 5.2 (5.1 to 5.4)       | 5.2 (5.1 to 5.4)       | 5.1 (4.9 to 5.2)            |
|                                                                   | <i>Change from 1994</i> | <b>-0.9</b> (-1.0 to -0.8)    | -0.9 (-1.0 to -0.7)         | -0.8 (-1.0 to -0.6)    | -0.9 (-1.1 to -0.7)    | -0.9 (-1.2 to -0.7)    | -1.1 (-1.3 to -0.9)         |
|                                                                   | <i>P-value</i>          | <b>(&lt;0.000)</b>            | (<0.000)                    | (<0.000)               | (<0.000)               | (<0.000)               | (<0.000)                    |
| <b>Total cholesterol ≥ 5.0 mmol/l (%)</b>                         | 1994                    | <b>87.2</b> (85.6 to 88.8)    | 89.6 (86.4 to 92.8)         | 87.6 (84.2 to 91.1)    | 86.2 (82.5 to 89.9)    | 85.7 (81.7 to 89.7)    | 86.6 (82.9 to 90.4)         |
|                                                                   | 2008                    | <b>58.1</b> (55.3 to 60.8)    | 67.2 (62.5 to 71.9)         | 61.3 (55.3 to 67.2)    | 54.6 (48.4 to 60.7)    | 53.2 (46.9 to 59.5)    | 52.5 (45.3 to 59.8)         |
|                                                                   | <i>Change from 1994</i> | <b>-29.1</b> (-32.3 to -25.9) | -22.4 (-28.1 to -16.7)      | -26.4 (-33.3 to -19.5) | -31.7 (-38.9 to -24.5) | -32.5 (-40.0 to -25.0) | -34.1 (-42.2 to -25.9)      |
|                                                                   | <i>P-value</i>          | <b>(&lt;0.000)</b>            | (<0.000)                    | (<0.000)               | (<0.000)               | (<0.000)               | (<0.000)                    |
| <b>Fruit and vegetable consumption (portions per day)</b>         | 2001                    | <b>3.6</b> (3.5 to 3.7)       | 4.0 (3.8 to 4.2)            | 3.9 (3.7 to 4.1)       | 3.7 (3.4 to 3.9)       | 3.4 (3.2 to 3.7)       | 2.9 (2.7 to 3.1)            |
|                                                                   | 2008                    | <b>3.9</b> (3.8 to 4.0)       | 4.1 (3.9 to 4.3)            | 4.1 (4.0 to 4.3)       | 4.1 (3.8 to 4.3)       | 3.6 (3.4 to 3.8)       | 3.4 (3.1 to 3.7)            |
|                                                                   | <i>Change from 2001</i> | <b>0.3</b> (0.1 to 0.4)       | 0.1 (-0.2 to 0.4)           | 0.2 (-0.1 to 0.5)      | 0.4 (0.1 to 0.7)       | 0.2 (-0.1 to 0.5)      | 0.6 (0.2 to 0.9)            |
|                                                                   | <i>P-value</i>          | <b>(&lt;0.000)</b>            | (0.448)                     | (0.134)                | (0.020)                | (0.242)                | (0.002)                     |
| <b>Fruit and vegetable consumption (≥ 5 portions per day) (%)</b> | 2001                    | <b>26.2</b> (24.4 to 28.0)    | 30.4 (26.6 to 34.2)         | 32.5 (28.5 to 36.4)    | 27.3 (23.3 to 31.3)    | 23.4 (19.3 to 27.5)    | 15.9 (12.1 to 19.6)         |
|                                                                   | 2008                    | <b>29.0</b> (27.2 to 30.9)    | 31.3 (27.5 to 35.1)         | 33.2 (29.4 to 37.0)    | 31.7 (27.5 to 35.9)    | 24.6 (20.7 to 28.5)    | 24.0 (19.6 to 28.3)         |
|                                                                   | <i>Change from 2001</i> | <b>2.8</b> (0.2 to 5.4)       | 0.9 (-4.4 to 6.3)           | 0.7 (-4.8 to 6.2)      | 4.4 (-1.3 to 10.2)     | 1.2 (-4.5 to 6.8)      | 8.1 (2.3 to 13.9)           |
|                                                                   | <i>P-value</i>          | <b>(0.032)</b>                | (0.733)                     | (0.800)                | (0.132)                | (0.679)                | (0.006)                     |
